# Supplementary material for: Energy-Level Interpretation of Carbazole Derivatives in Self-Assembling Monolayer
Source: MDPI journal article supplement (doi:10.3390/molecules29091910), 2024-04-23
Supplement: s1 [file s1]

## Supplementary Information

### Contents

|                                                                 |      |
|-----------------------------------------------------------------|------|
| Photoelectron emission yield spectra of SAM films.....          | 1 pp |
| Photoelectron emission yield spectra of bulky samples.....      | 4 pp |
| Highest occupied molecular orbital of SAM.....                  | 7 pp |
| Photovoltaic parameters of bulk heterojunction solar cells..... | 8 pp |
| Formula of correlation coefficient.....                         | 8 pp |
| References.....                                                 | 8 pp |

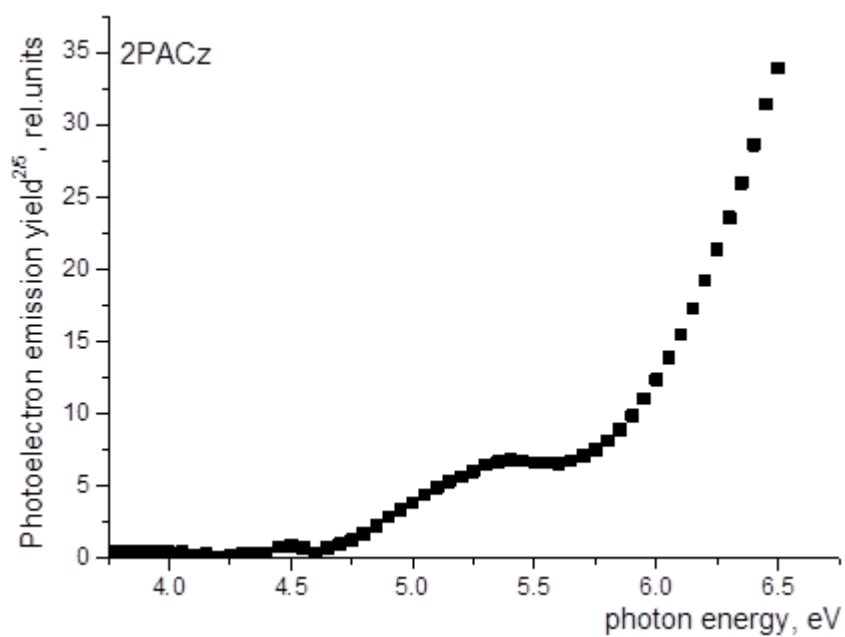

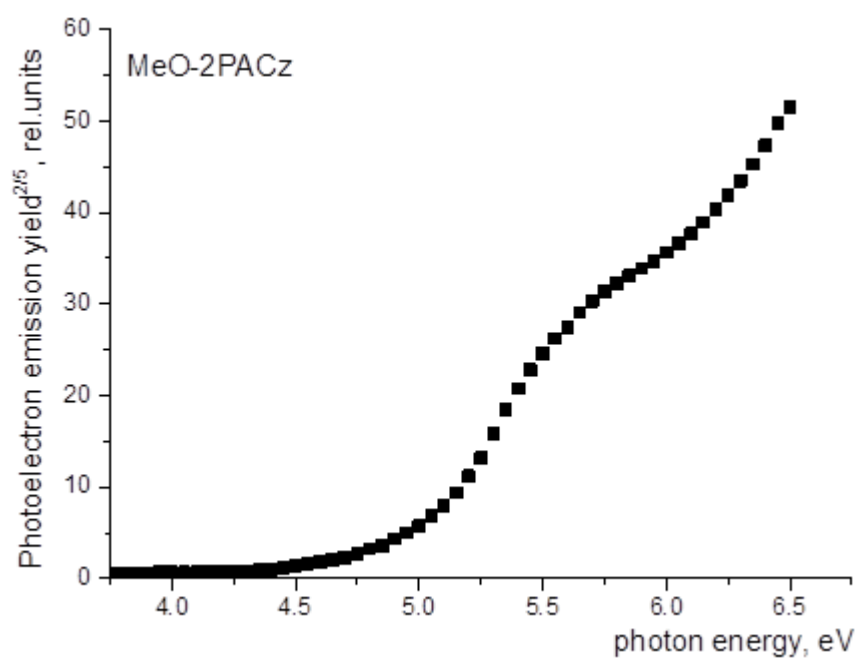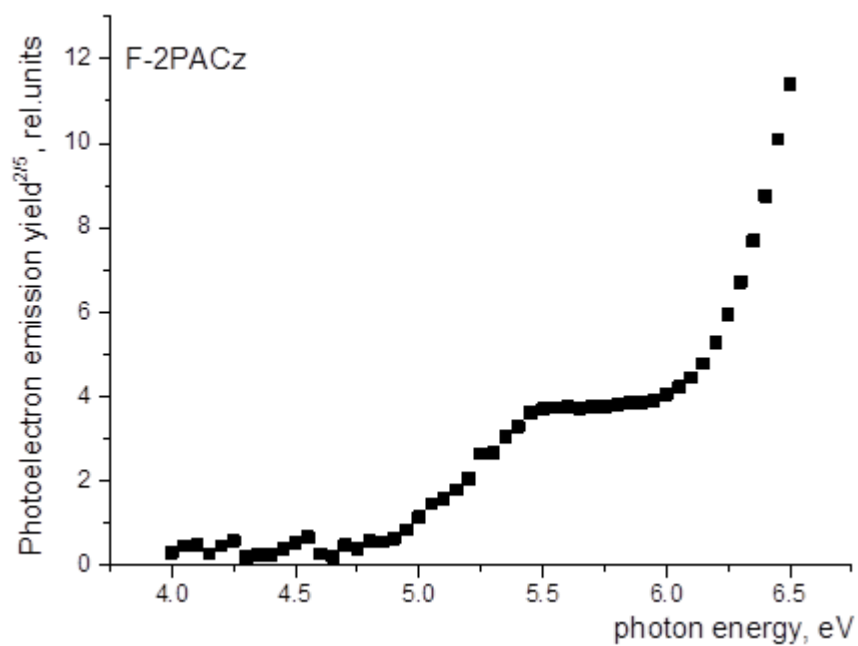

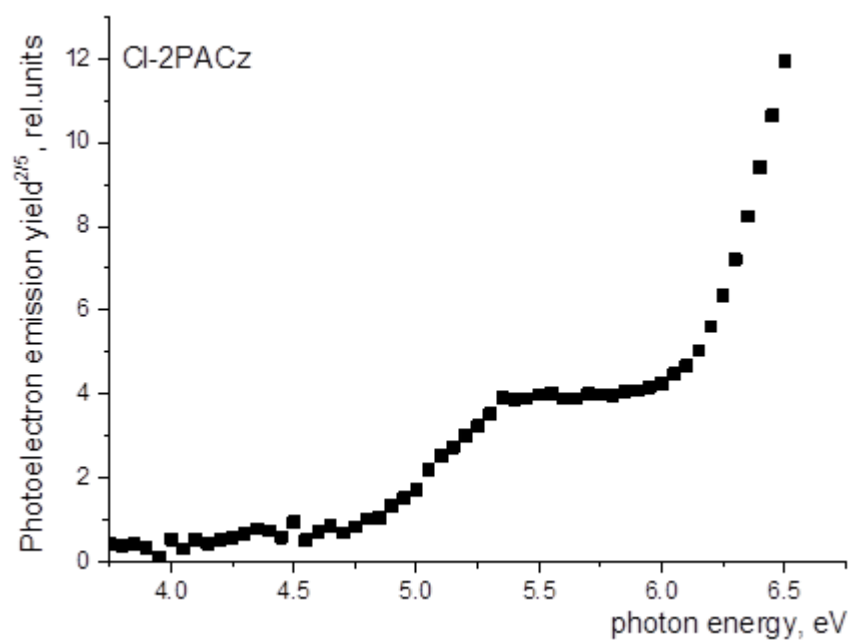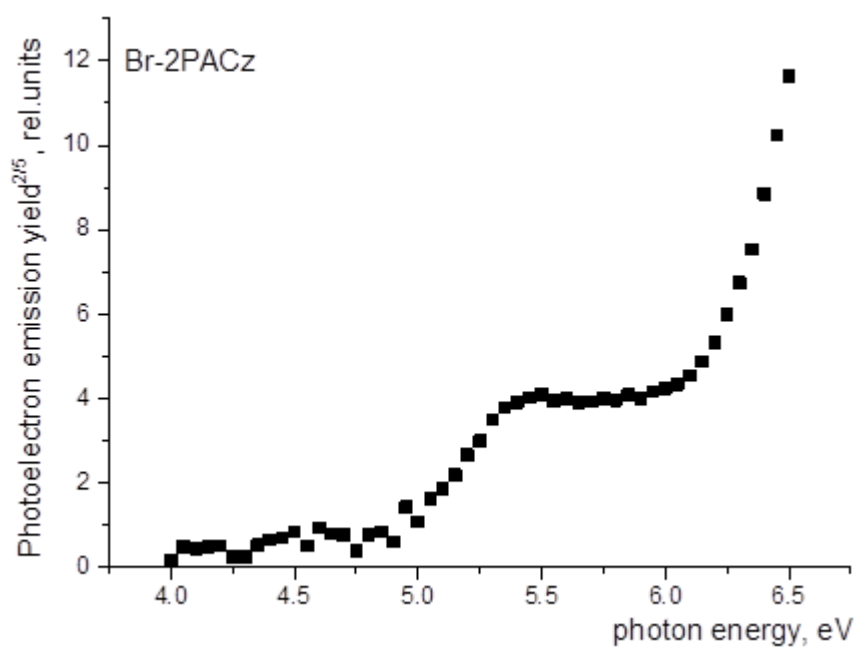

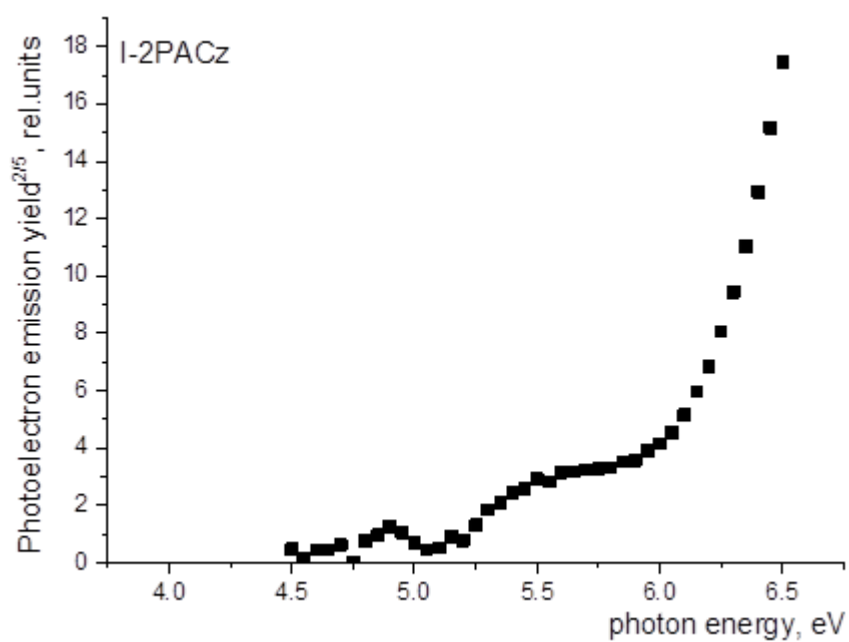

**Figure S1.** Photoelectron emission yield spectra of SAM films

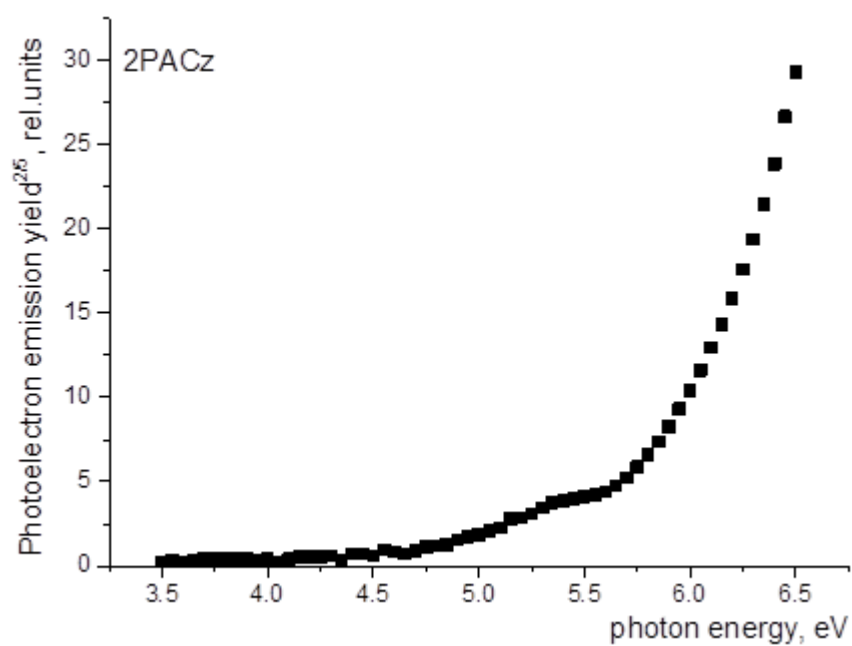

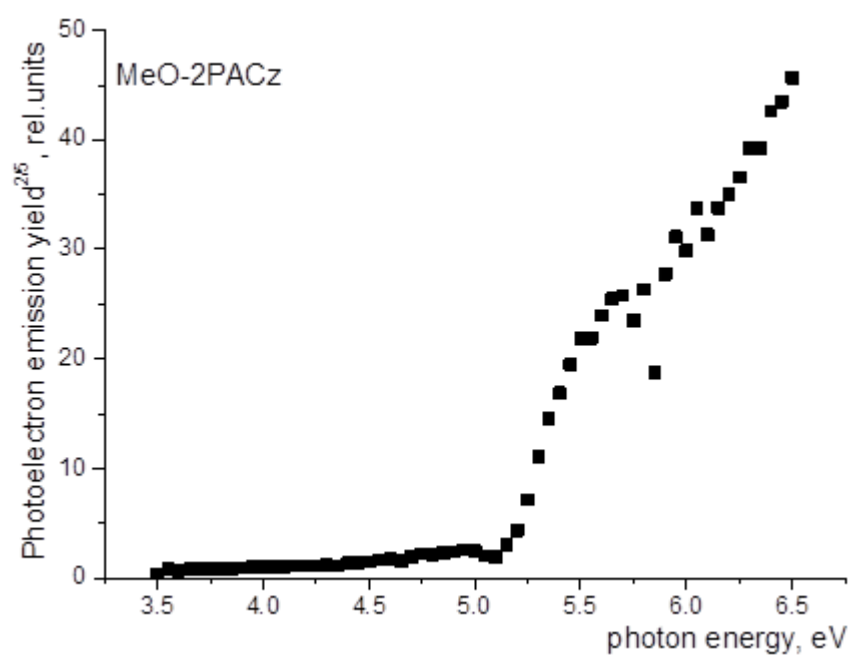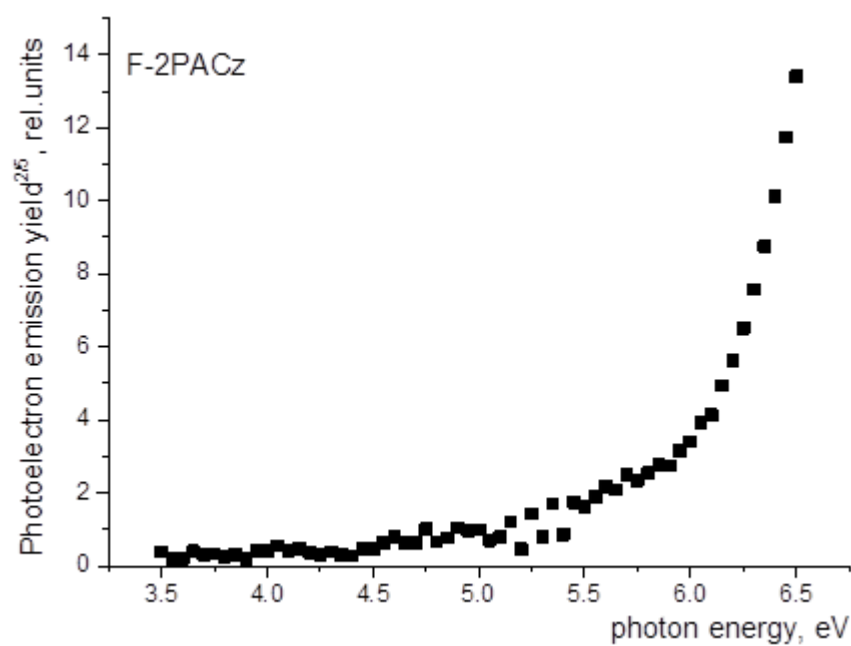

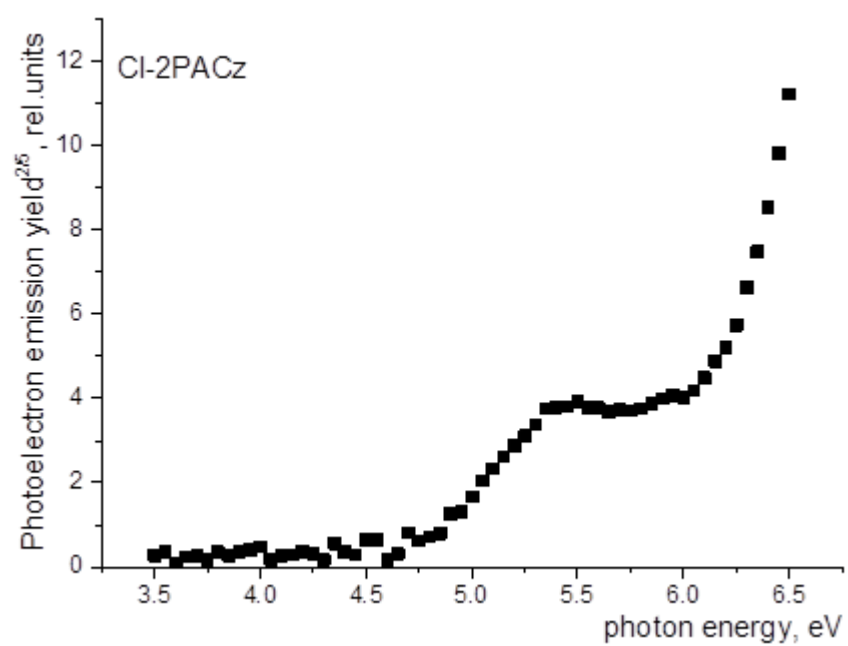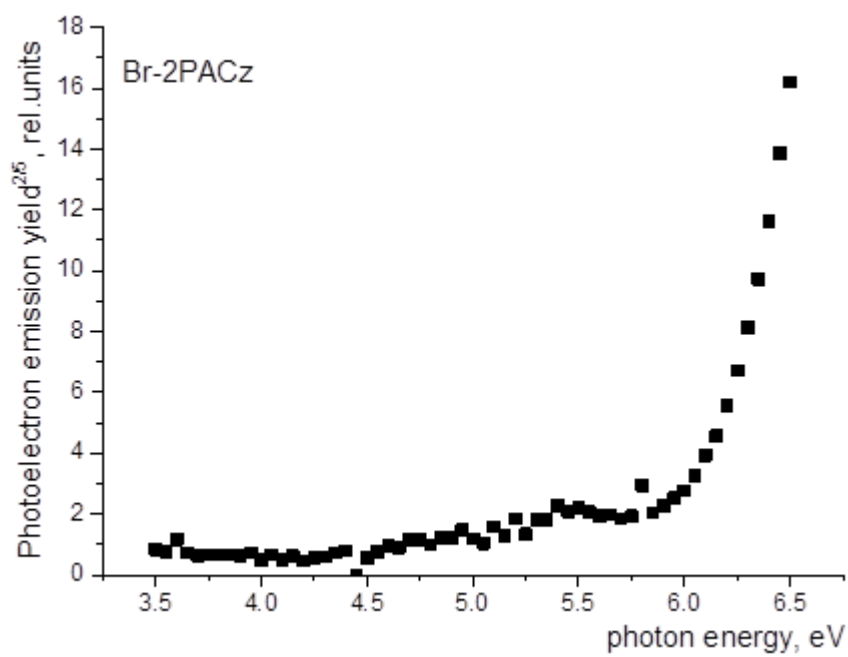

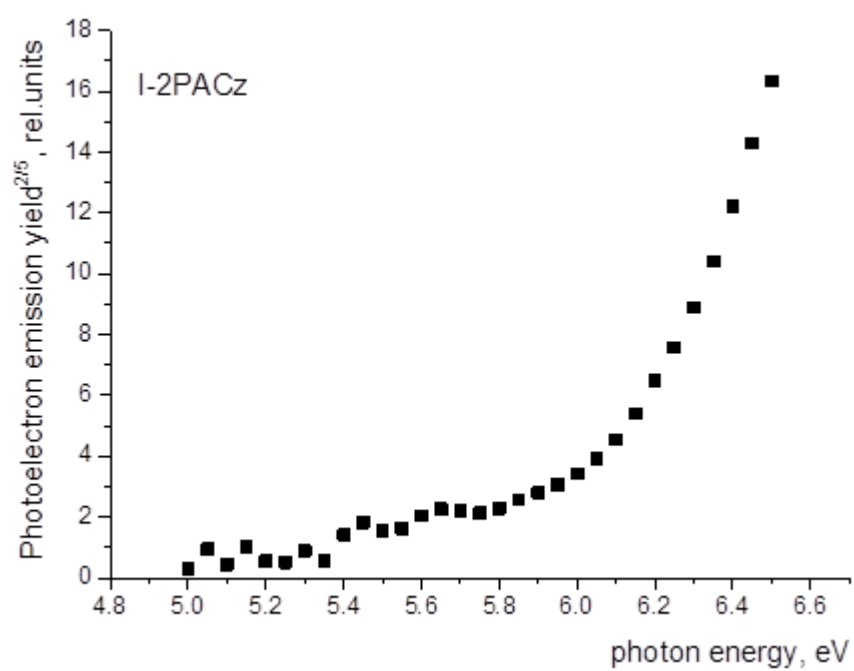

Figure S2. Photoelectron emission yield spectra of bulky samples

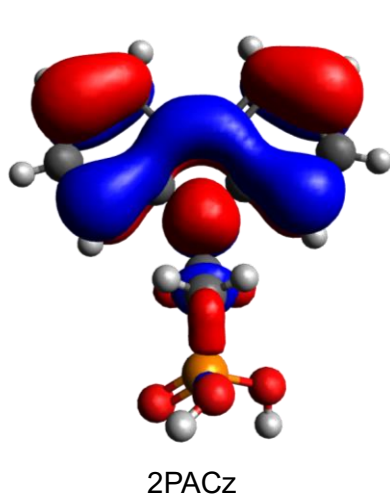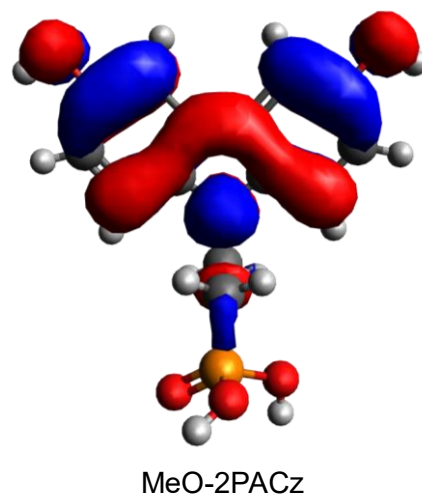

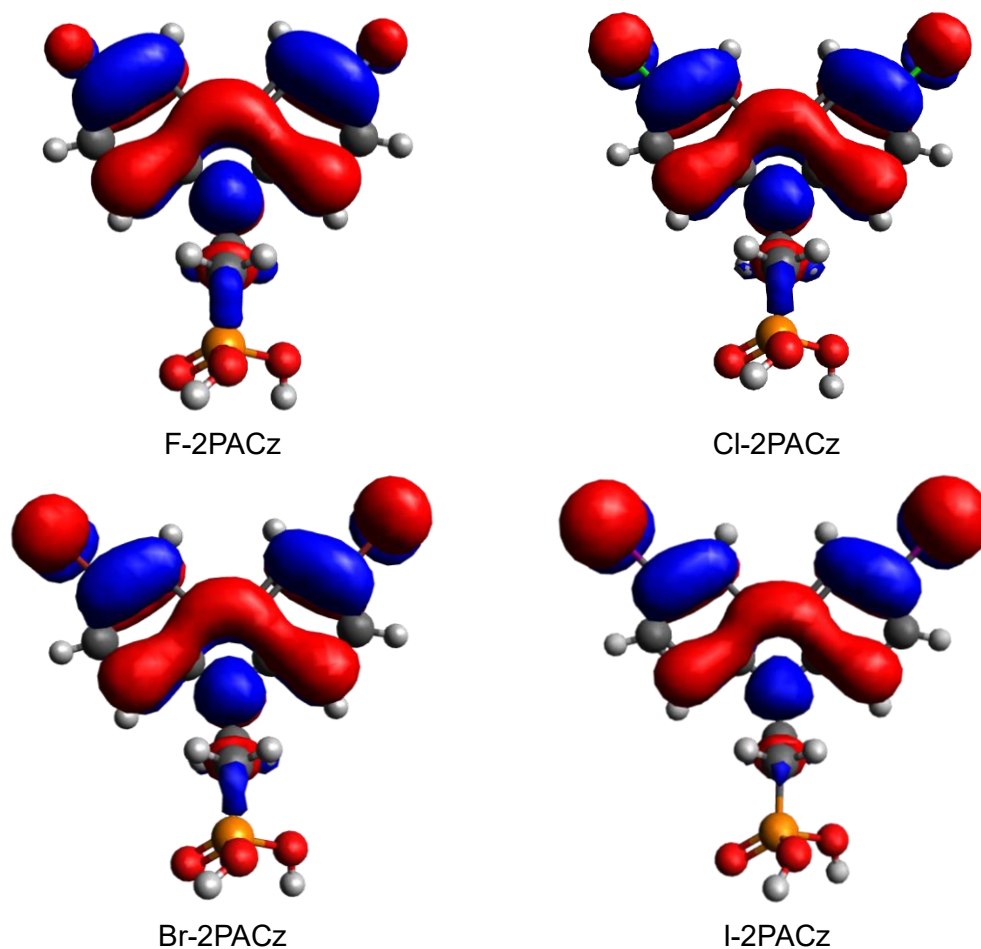

**Figure S3.** Highest occupied molecular orbital of SAM.

**Table S1.** Photovoltaic parameters of bulk heterojunction solar cells from references [25-27].  $V_{oc}$  – open circuit voltage, FF – fill factor,  $J_{sc}$  – short circuit current, PCE – power conversation efficiency.

| SAM       | $V_{oc}$ , V | FF, % | $J_{sc}$ ,<br>$\text{mA}/\text{cm}^2$ | PCE, % | References |
|-----------|--------------|-------|---------------------------------------|--------|------------|
| 2PACz     | 0.845        | 79.2  | 26.94                                 | 18.03  | [1]        |
| MeO-2PACz | 0.776        | 71.3  | 26.21                                 | 14.5   | [2]        |
| F-2PACz   | 0.846        | 78.2  | 26.8                                  | 17.7   | [3]        |
| Cl-2PACz  | 0.863        | 79.4  | 26.96                                 | 18.5   | [3]        |
| Br-2PACz  | 0.870        | 77.9  | 26.57                                 | 18.0   | [3]        |
| I-2PACz   | 0.858        | 78.8  | 26.85                                 | 18.2   | [3]        |



Correlation coefficient was calculated by the formula:

$$R = \frac{\sum_{i=1}^n (x_i - \bar{x})(y_i - \bar{y})}{\sqrt{\sum_{i=1}^n (x_i - \bar{x})^2} \sqrt{\sum_{i=1}^n (y_i - \bar{y})^2}},$$

where  $x$  – ionisation energy value or work function- value,  $y$  – solar cells parameter,  $\bar{x}$  and  $\bar{y}$  – mean values of the parameters.

## References

- [25] Lin, Y.; Zhang, Y.; Zhang, J.; Marcinskas, M.; Malinauskas, T.; Magomedov, A.; Nugraha, M.I.; Kaltsas, D.; Naphade, D.R.; Harrison, G.T.; et al. 18.9% Efficient Organic Solar Cells Based on n-Doped Bulk-Heterojunction and Halogen-Substituted Self-Assembled Monolayers as Hole Extracting Interlayers. *Adv Energy Mater* 2022, 12, doi:10.1002/aenm.202202503.
- [26] Lin, Y.; Magomedov, A.; Firdaus Y.; Kaltsas, D.; El-Labban, A.; Faber, H.; Naphade, D.R.; Yengel, E.; Zheng, X.; Yarali, E.; et al. 18.4 % Organic Solar Cells Using a High Ionization Energy Self-Assembled Monolayer as Hole-Extraction Interlayer. *ChemSusChem* 2021, 14, 3569-3578, doi:10.1002/cssc.202100707
- [27] Lin, Y.; Firdaus, Y.; Isikgor, F.H.; Nugraha, M.I.; Yengel, E.; Harrison, G.T., Hallani, R.; El-Labban, A.; Faber, H.; Ma C.; et al. Self-Assembled Monolayer Enables Hole Transport Layer-Free Organic Solar Cells with 18% Efficiency and Improved Operational Stability. *ACS Energy Lett.* 2020, 5, 2935–2944, doi:10.1021/acsenerylett.0c01421
